# Supplementary material
Source: Springer Nature journal article supplement (https://www.springermedizin.de/resource/supplementary/12958_2010_839_MOESM5_ESM.pdf/9568978)

ng/ml

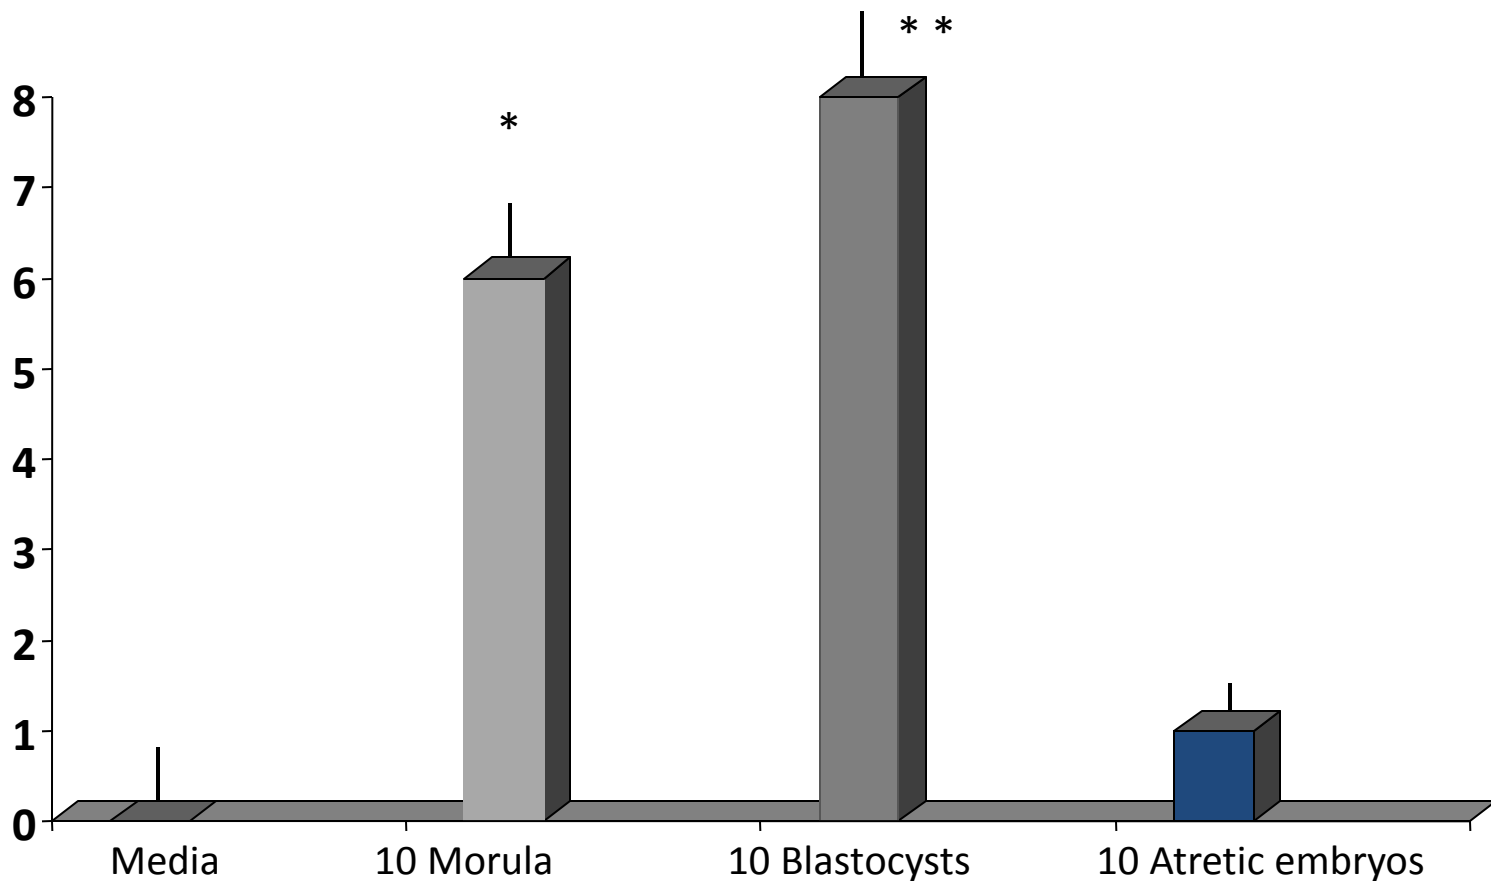

Mean +/- SEM

Supplement: MOESM5 [file 9568978]
